# Supplementary material
Source: publisher figshare collection journal article supplement (https://karger.figshare.com/articles/dataset/_/5123590)
Supplement: Supplementary file 1 [file 1 › 000338940_sm_Figure_2.pdf]

## **Annex B**

### **PARENT INFORMATION SHEET**

Dear parent/guardian,

We seek your help to have this short survey completed. We are inviting Secondary 3 students in Singapore to answer questions about **peanut, nut and seafood allergies**, with the approval of the Ministry of Education. Your child has indicated that he/she has at least one of the allergies listed above. We ask that you help your child complete this simple questionnaire. **The information you provide will be treated confidentially.** It will help medical authorities understand allergic diseases better and formulate management strategies for our Singapore schoolchildren. Hence, your participation will be greatly appreciated. Simply return the completed form to us using the pre-paid envelopes.

In case you require any medical advice with regards to your child's food allergy, kindly call our hotline 91380032 during office hours.

Thank you very much for your kind co-operation, it is greatly appreciated.

Yours sincerely,

Dr Lynette Shek  
Department of Paediatrics  
National University of Singapore

---

I, \_\_\_\_\_ (name of parent/guardian), consent to let my child  
\_\_\_\_\_ (name of child) of class \_\_\_\_\_, of  
\_\_\_\_\_ (school) to participate in this survey. I understand that  
the information which I provide will be confidential.

Signature of parent/guardian: \_\_\_\_\_ / \_\_\_\_\_ (Date)

Address: \_\_\_\_\_

Contact number: \_\_\_\_\_ (home) \_\_\_\_\_ (office) \_\_\_\_\_ (hp)

---

## FISH ALLERGY

*If you have ever had **fish allergy**, please answer the following questions.*

|                                                                                                                                                                                           |                                                                                                                                                                                                                                                                                                                                                                                                                                                                                                                                                                                   |
|-------------------------------------------------------------------------------------------------------------------------------------------------------------------------------------------|-----------------------------------------------------------------------------------------------------------------------------------------------------------------------------------------------------------------------------------------------------------------------------------------------------------------------------------------------------------------------------------------------------------------------------------------------------------------------------------------------------------------------------------------------------------------------------------|
| <p>1. Which fish are you allergic to? (can tick more than 1)</p>                                                                                                                          | <div style="text-align: right;">                 Cod <input type="checkbox"/><br/>                 Tuna <input type="checkbox"/><br/>                 Salmon <input type="checkbox"/><br/>                 Threadfin / Ikan Kurau <input type="checkbox"/><br/>                 Anchovy / Ikan Bilis <input type="checkbox"/><br/>                 Pomfret <input type="checkbox"/><br/>                 Tengirri <input type="checkbox"/><br/>                 White bait fish <input type="checkbox"/><br/>                 Not sure which fish <input type="checkbox"/> </div> |
| <p style="text-align: right;">Others, pls specify: _____</p>                                                                                                                              |                                                                                                                                                                                                                                                                                                                                                                                                                                                                                                                                                                                   |
| <p>1a. If you are allergic to more than one fish, indicate which fish gave the most severe reaction (leave blank if not sure). <span style="float: right;">Name of Fish: _____</span></p> |                                                                                                                                                                                                                                                                                                                                                                                                                                                                                                                                                                                   |
| <p><b>QUESTIONS 2 to 13 DEAL WITH YOUR MOST SEVERE REACTION TO FISH</b></p>                                                                                                               |                                                                                                                                                                                                                                                                                                                                                                                                                                                                                                                                                                                   |
| <p>2. About how old were you when you first ate this fish?</p>                                                                                                                            | <p>_____ years old</p>                                                                                                                                                                                                                                                                                                                                                                                                                                                                                                                                                            |
| <p>2a. If you are not sure, can you give us an estimate?</p>                                                                                                                              | <div> <input type="checkbox"/> &lt; 1 year old<br/> <input type="checkbox"/> 1 – 5 years old<br/> <input type="checkbox"/> 6 – 10 years old<br/> <input type="checkbox"/> 11 – 16 years old<br/> <input type="checkbox"/> Don't know<br/> <input type="checkbox"/> Never eaten                 </div>                                                                                                                                                                                                                                                                             |
| <p>3. Did you have an allergic reaction to this fish the FIRST time you ate it?</p>                                                                                                       |                                                                                                                                                                                                                                                                                                                                                                                                                                                                                                                                                                                   |
| <div> <input type="checkbox"/> Yes<br/> <input type="checkbox"/> No<br/> <input type="checkbox"/> Not sure                 </div>                                                         |                                                                                                                                                                                                                                                                                                                                                                                                                                                                                                                                                                                   |
| <p>IF YOU ANSWERED “<b>FOUND OUT BY ALLERGY TEST</b>”, PLEASE SKIP TO <b>QUESTION 9</b></p>                                                                                               |                                                                                                                                                                                                                                                                                                                                                                                                                                                                                                                                                                                   |
| <p style="text-align: right;">Found out by allergy test, no first reaction <input type="checkbox"/></p>                                                                                   |                                                                                                                                                                                                                                                                                                                                                                                                                                                                                                                                                                                   |
| <p>4. How old were you when you FIRST had a reaction to this fish?</p>                                                                                                                    | <p>_____ years old</p>                                                                                                                                                                                                                                                                                                                                                                                                                                                                                                                                                            |
| <p>4a. If you are not sure, can you give us an estimate?</p>                                                                                                                              | <div> <input type="checkbox"/> &lt; 1 year old<br/> <input type="checkbox"/> 1 – 5 years old<br/> <input type="checkbox"/> 6 – 10 years old<br/> <input type="checkbox"/> 11 – 16 years old<br/> <input type="checkbox"/> Don't know                 </div>                                                                                                                                                                                                                                                                                                                       |

|                                                                                                                                                                                                                                                                                                                                                                                                                                                                                                                      |                              |                             |                                     |
|----------------------------------------------------------------------------------------------------------------------------------------------------------------------------------------------------------------------------------------------------------------------------------------------------------------------------------------------------------------------------------------------------------------------------------------------------------------------------------------------------------------------|------------------------------|-----------------------------|-------------------------------------|
| 5. During the <u>MOST SEVERE</u> allergic reaction to the fish, did you have the following symptoms?                                                                                                                                                                                                                                                                                                                                                                                                                 |                              |                             |                                     |
| • Hives (urticaria, itchy rash like mosquito bites)                                                                                                                                                                                                                                                                                                                                                                                                                                                                  | Yes <input type="checkbox"/> | No <input type="checkbox"/> | Don't know <input type="checkbox"/> |
| • Swelling of eyes (eyelids)                                                                                                                                                                                                                                                                                                                                                                                                                                                                                         | Yes <input type="checkbox"/> | No <input type="checkbox"/> | Don't know <input type="checkbox"/> |
| • Swelling of lips or face                                                                                                                                                                                                                                                                                                                                                                                                                                                                                           | Yes <input type="checkbox"/> | No <input type="checkbox"/> | Don't know <input type="checkbox"/> |
| • Vomiting                                                                                                                                                                                                                                                                                                                                                                                                                                                                                                           | Yes <input type="checkbox"/> | No <input type="checkbox"/> | Don't know <input type="checkbox"/> |
| • Diarrhoea                                                                                                                                                                                                                                                                                                                                                                                                                                                                                                          | Yes <input type="checkbox"/> | No <input type="checkbox"/> | Don't know <input type="checkbox"/> |
| • Abdominal pain                                                                                                                                                                                                                                                                                                                                                                                                                                                                                                     | Yes <input type="checkbox"/> | No <input type="checkbox"/> | Don't know <input type="checkbox"/> |
| • Congested or running nose                                                                                                                                                                                                                                                                                                                                                                                                                                                                                          | Yes <input type="checkbox"/> | No <input type="checkbox"/> | Don't know <input type="checkbox"/> |
| • Itchy throat or mouth                                                                                                                                                                                                                                                                                                                                                                                                                                                                                              | Yes <input type="checkbox"/> | No <input type="checkbox"/> | Don't know <input type="checkbox"/> |
| • Throat tightness or choking                                                                                                                                                                                                                                                                                                                                                                                                                                                                                        | Yes <input type="checkbox"/> | No <input type="checkbox"/> | Don't know <input type="checkbox"/> |
| • Coughing                                                                                                                                                                                                                                                                                                                                                                                                                                                                                                           | Yes <input type="checkbox"/> | No <input type="checkbox"/> | Don't know <input type="checkbox"/> |
| • Wheezing or trouble breathing                                                                                                                                                                                                                                                                                                                                                                                                                                                                                      | Yes <input type="checkbox"/> | No <input type="checkbox"/> | Don't know <input type="checkbox"/> |
| • Faint or dizzy                                                                                                                                                                                                                                                                                                                                                                                                                                                                                                     | Yes <input type="checkbox"/> | No <input type="checkbox"/> | Don't know <input type="checkbox"/> |
| • Loss of consciousness                                                                                                                                                                                                                                                                                                                                                                                                                                                                                              | Yes <input type="checkbox"/> | No <input type="checkbox"/> | Don't know <input type="checkbox"/> |
| • Redness of skin                                                                                                                                                                                                                                                                                                                                                                                                                                                                                                    | Yes <input type="checkbox"/> | No <input type="checkbox"/> | Don't know <input type="checkbox"/> |
| • Other symptoms, please specify _____                                                                                                                                                                                                                                                                                                                                                                                                                                                                               |                              |                             |                                     |
| <div> <div>6. During this <u>MOST SEVERE</u> episode, after you ate this fish, about how long did it take for the allergic reaction to occur?</div> <div> <div>In less than 10 minutes <input type="checkbox"/></div> <div>In 10 minutes to 1 hour <input type="checkbox"/></div> <div>In 1 to 2 hours <input type="checkbox"/></div> <div>In 2 to 12 hours <input type="checkbox"/></div> <div>After more than 12 hours <input type="checkbox"/></div> <div>Don't know <input type="checkbox"/></div> </div> </div> |                              |                             |                                     |
| 7. Did you need/use any of the following in that <u>MOST SEVERE</u> reaction?                                                                                                                                                                                                                                                                                                                                                                                                                                        |                              |                             |                                     |
| • Treatment at emergency department or hospitalisation                                                                                                                                                                                                                                                                                                                                                                                                                                                               | Yes <input type="checkbox"/> | No <input type="checkbox"/> | Don't know <input type="checkbox"/> |
| • Antihistamine (e.g. Piriton, Benadryl, Atarax, Zyrtec, etc)                                                                                                                                                                                                                                                                                                                                                                                                                                                        | Yes <input type="checkbox"/> | No <input type="checkbox"/> | Don't know <input type="checkbox"/> |
| • Epinephrine/ Adrenaline (Epipen)                                                                                                                                                                                                                                                                                                                                                                                                                                                                                   | Yes <input type="checkbox"/> | No <input type="checkbox"/> | Don't know <input type="checkbox"/> |
| • Steroids/ Prednisolone                                                                                                                                                                                                                                                                                                                                                                                                                                                                                             | Yes <input type="checkbox"/> | No <input type="checkbox"/> | Don't know <input type="checkbox"/> |
| • Asthma medicines (e.g. inhalers)                                                                                                                                                                                                                                                                                                                                                                                                                                                                                   | Yes <input type="checkbox"/> | No <input type="checkbox"/> | Don't know <input type="checkbox"/> |
| 8. Have you had an allergy test to confirm the allergy to this fish?                                                                                                                                                                                                                                                                                                                                                                                                                                                 |                              |                             |                                     |
|                                                                                                                                                                                                                                                                                                                                                                                                                                                                                                                      |                              |                             | Yes <input type="checkbox"/>        |
|                                                                                                                                                                                                                                                                                                                                                                                                                                                                                                                      |                              |                             | No <input type="checkbox"/>         |
|                                                                                                                                                                                                                                                                                                                                                                                                                                                                                                                      |                              |                             | Don't know <input type="checkbox"/> |
| 9. Have you ever seen a doctor for your allergy to this fish?                                                                                                                                                                                                                                                                                                                                                                                                                                                        |                              |                             |                                     |
|                                                                                                                                                                                                                                                                                                                                                                                                                                                                                                                      |                              |                             | Yes <input type="checkbox"/>        |
|                                                                                                                                                                                                                                                                                                                                                                                                                                                                                                                      |                              |                             | No <input type="checkbox"/>         |
| IF YOU ANSWERED "NO" or "DON'T KNOW" PLEASE SKIP TO QUESTION 13                                                                                                                                                                                                                                                                                                                                                                                                                                                      |                              |                             | Don't know <input type="checkbox"/> |
| 10. Has a doctor ever prescribed injectable epinephrine (Epipen) for you?                                                                                                                                                                                                                                                                                                                                                                                                                                            |                              |                             |                                     |
|                                                                                                                                                                                                                                                                                                                                                                                                                                                                                                                      |                              |                             | Yes <input type="checkbox"/>        |
|                                                                                                                                                                                                                                                                                                                                                                                                                                                                                                                      |                              |                             | No <input type="checkbox"/>         |
| IF YOU ANSWERED "NO" or "DON'T KNOW" PLEASE SKIP TO QUESTION 13                                                                                                                                                                                                                                                                                                                                                                                                                                                      |                              |                             | Don't know <input type="checkbox"/> |
| 11. Do you have injectable epinephrine with you at all times?                                                                                                                                                                                                                                                                                                                                                                                                                                                        |                              |                             |                                     |
|                                                                                                                                                                                                                                                                                                                                                                                                                                                                                                                      |                              |                             | Yes <input type="checkbox"/>        |
|                                                                                                                                                                                                                                                                                                                                                                                                                                                                                                                      |                              |                             | No <input type="checkbox"/>         |
| IF YOU ANSWERED "NO" or "DON'T KNOW" PLEASE SKIP TO QUESTION 13                                                                                                                                                                                                                                                                                                                                                                                                                                                      |                              |                             | Don't know <input type="checkbox"/> |

|                                                                               |                                                                                                                                                                                                                                                                    |
|-------------------------------------------------------------------------------|--------------------------------------------------------------------------------------------------------------------------------------------------------------------------------------------------------------------------------------------------------------------|
| <p>12. Why do you NOT carry injectable epinephrine with you at all times?</p> | <p>Not necessary <input type="checkbox"/></p> <p>Avoid the fish anyway <input type="checkbox"/></p> <p>Never been prescribed <input type="checkbox"/></p> <p>Not available <input type="checkbox"/></p> <p>Others, pls specify: <input type="checkbox"/></p> <hr/> |
| <p>13. Are you now able to eat this fish without any reactions?</p>           | <p>Still have reactions <input type="checkbox"/></p> <p>Eat now with no reaction <input type="checkbox"/></p> <p>Haven't eaten again <input type="checkbox"/></p> <p>Only react sometimes <input type="checkbox"/></p> <p>Don't know <input type="checkbox"/></p>  |

IF YOU WOULD LIKE TO CONTACT US FOR FURTHER INFORMATION ON YOUR ALLERGY, PLEASE CALL  
MS SITI DAHLIA AT **67724450**.  
OTHERWISE, YOU HAVE REACHED THE END OF THE QUESTIONNAIRE.

Thank you for taking the time to complete this questionnaire.  
The information you have provided is confidential.
